# Supplementary material for: Predictive Value of Circulating miRNAs in Lymph Node Metastasis for Colon Cancer
Source: PubMed Central journal article supplement (PMC7912296; doi:10.3390/genes12020176), 2021-01-27
Supplement: genes-12-00176-s001.pdf [file genes-12-00176-s001.pdf]

Supplementary Materials

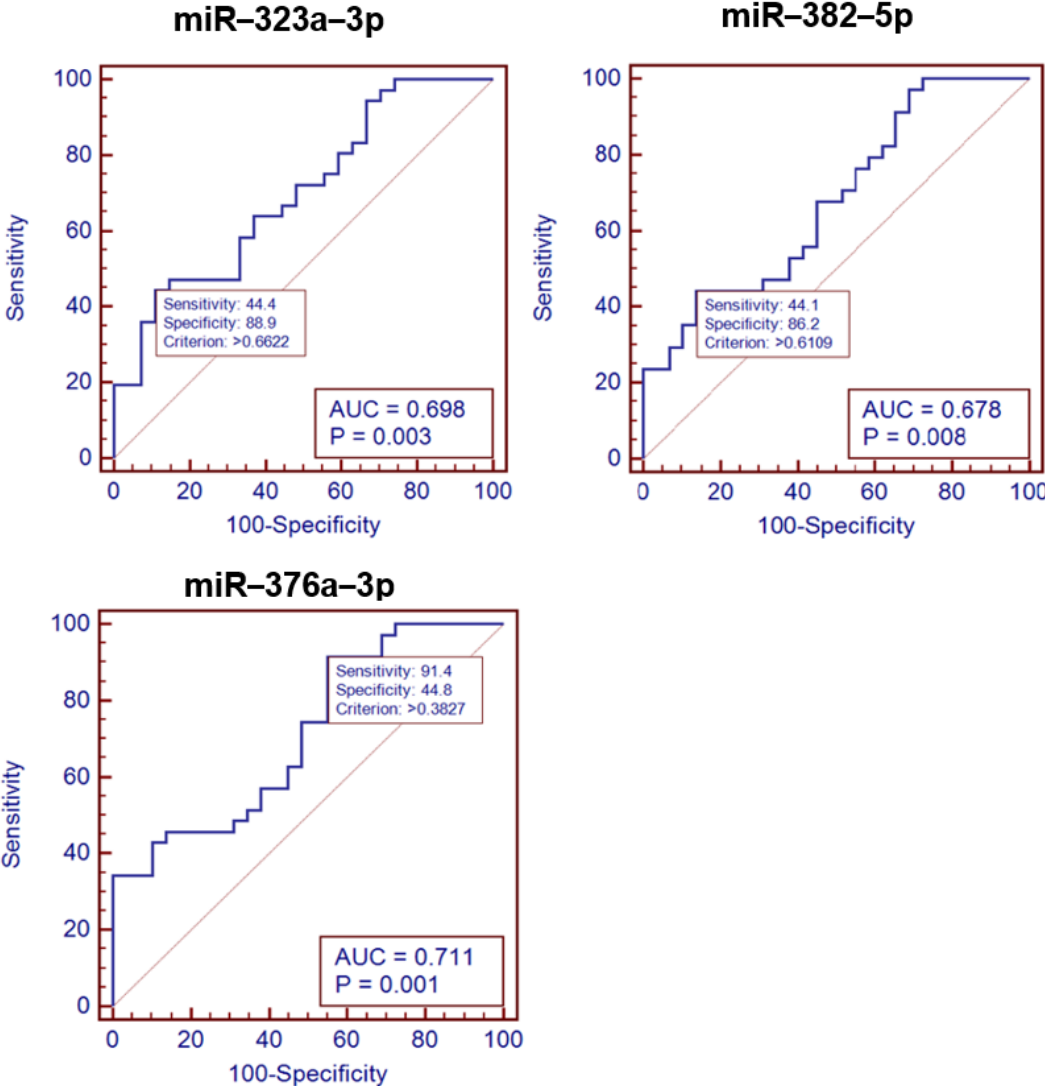

**Figure S1.** ROC curves of the three miR levels for determining the presence of LN metastasis. The area under the ROC curve (AUC) for LN metastasis was highest for miR-376a-3p (0.711), followed by miR-323a-3p (0.698) and miR-382-5p(0.678).
